# Supplementary material
Source: publisher site journal article supplement (https://www.dovepress.com/article/331431)

| **Gene** | **Immune cells** | ***R*** | ***P*** |
| --- | --- | --- | --- |
| ARNTL2 | B cells naive | -0.17 | 0.130 |
| ARNTL2 | B cells memory | -0.07 | 0.530 |
| ARNTL2 | Plasma cells | -0.20 | 0.071 |
| ARNTL2 | T cells CD8 | -0.06 | 0.580 |
| ARNTL2 | T cells CD4 naive | -0.09 | 0.400 |
| ARNTL2 | T cells CD4 memory resting | 0.02 | 0.840 |
| ARNTL2 | T cells follicular helper | 0.14 | 0.190 |
| ARNTL2 | T cells regulatory (Tregs) | 0.01 | 0.930 |
| ARNTL2 | T cells gamma delta | -0.21 | 0.051 |
| ARNTL2 | NK cells resting | 0.01 | 0.390 |
| ARNTL2 | NK cells activated | 0.01 | 0.920 |
| ARNTL2 | Monocytes | 0.04 | 0.700 |
| ARNTL2 | Macrophages M0 | -0.11 | 0.320 |
| ARNTL2 | Macrophages M1 | 0.16 | 0.160 |
| ARNTL2 | Macrophages M2 | 0.04 | 0.740 |
| ARNTL2 | Dendritic cells resting | 0.16 | 0.150 |
| ARNTL2 | Dendritic cells activated | 0.21 | 0.051 |
| ARNTL2 | Mast cells resting | -0.20 | 0.073 |
| ARNTL2 | Eosinophils | 0.03 | 0.760 |

**Supplementary Table S1.** The correlation between ARNTL2 and immune cell infiltration in TNBC from TCGA dataset.

**Supplementary Table S2.** The correlation between ARNTL2 and immune cell infiltration in TNBC from the GSE31448 dataset.

| **Gene** | **Immune cells** | ***R*** | ***P*** |
| --- | --- | --- | --- |
| ARNTL2 | B cells naive | 0.14 | 0.220 |
| ARNTL2 | B cells memory | -0.05 | 0.660 |
| ARNTL2 | Plasma cells | -0.06 | 0.600 |
| ARNTL2 | T cells CD8 | -0.04 | 0.750 |
| ARNTL2 | T cells CD4 naive | -0.20 | 0.076 |
| ARNTL2 | T cells CD4 memory resting | -0.05 | 0.680 |
| ARNTL2 | T cells CD4 memory activated | 0.37 | **0.000a** |
| ARNTL2 | T cells follicular helper | 0.20 | 0.073 |
| ARNTL2 | T cells regulatory (Tregs) | -0.26 | **0.018** |
| ARNTL2 | T cells gamma delta | 0.03 | 0.800 |
| ARNTL2 | NK cells resting | 0.13 | 0.230 |
| ARNTL2 | NK cells activated | -0.15 | 0.190 |
| ARNTL2 | Monocytes | -0.04 | 0.740 |
| ARNTL2 | Macrophages M0 | 0.11 | 0.340 |
| ARNTL2 | Macrophages M1 | 0.42 | **0.000a** |
| ARNTL2 | Macrophages M2 | -0.31 | **0.005** |
| ARNTL2 | Dendritic cells resting | 0.23 | **0.039** |
| ARNTL2 | Dendritic cells activated | 0.33 | **0.002** |
| ARNTL2 | Mast cells resting | -0.32 | **0.004** |
| ARNTL2 | Mast cells activated | -0.14 | 0.210 |
| ARNTL2 | Eosinophils | 0.23 | **0.035** |
| ARNTL2 | Neutrophils | 0.28 | **0.010** |

a *P*<0.001.

**Supplementary Figure S1.** The differential gene expression between non-TNBC and TNBC in the TCGA dataset. The volcano plot showed the identified differential genes between non-TNBC and TNBC based on the cutoff criteria [adjusted *P-*value < 0.01, |log2 FC| ≥ 1].


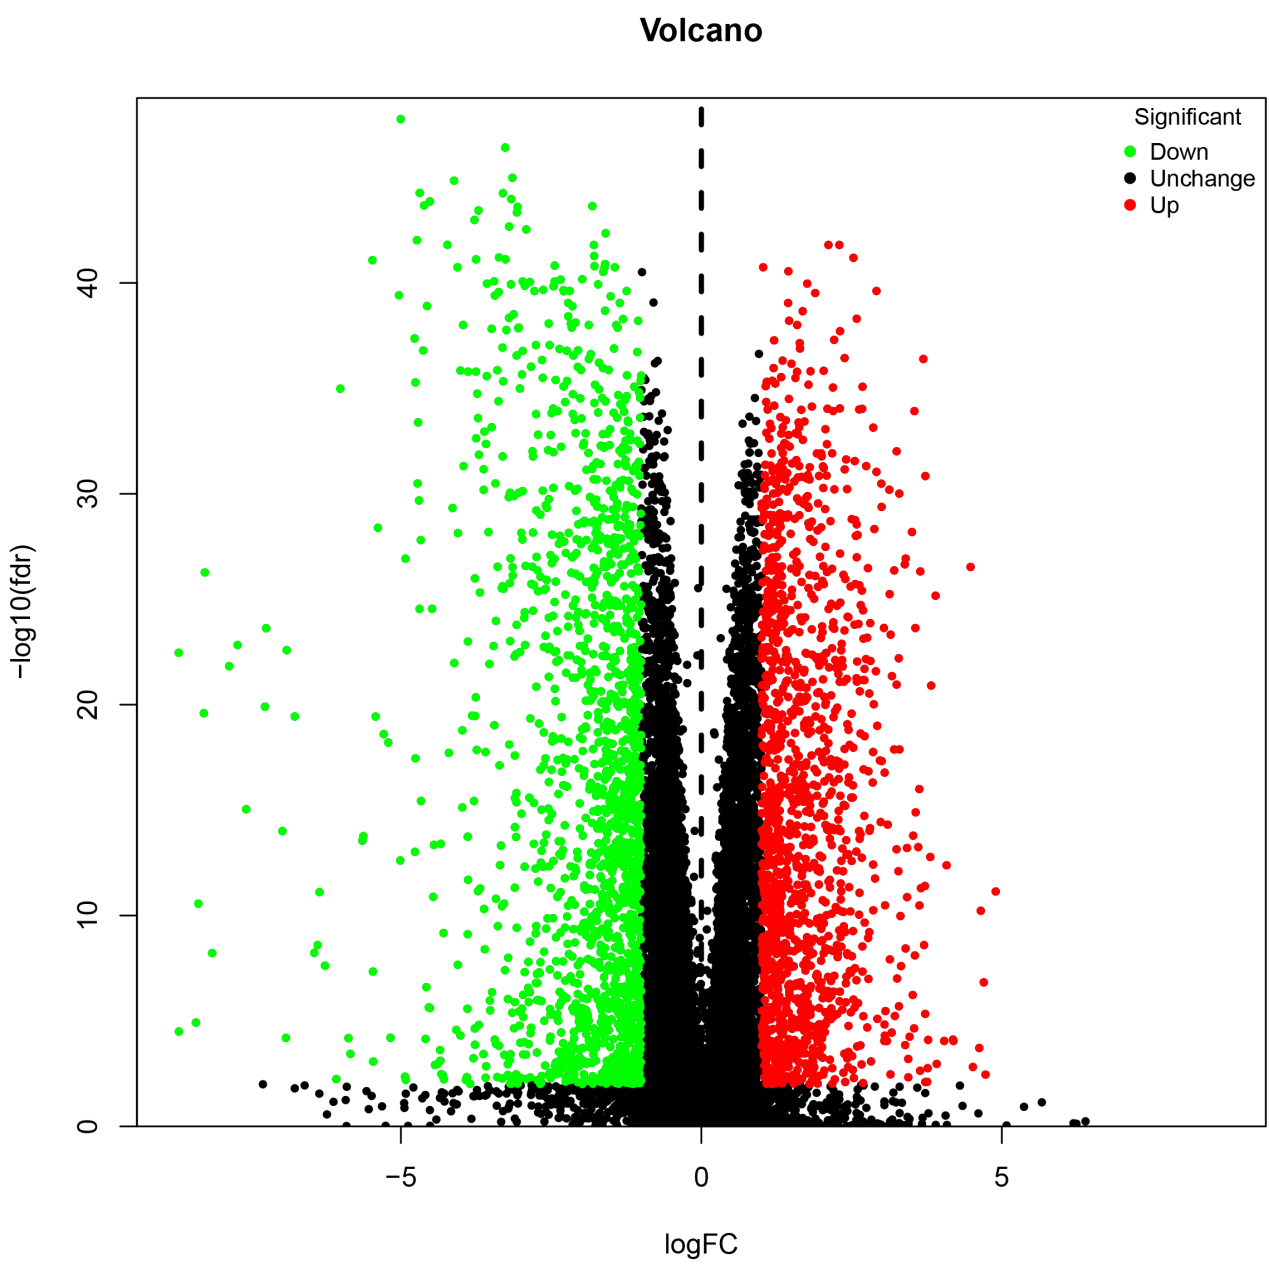


**Supplementary Figure S2.** GSEA enrichment analysis of ARNTL2 in TNBC sample from TCGA database. **(A)** High ARNTL2 expression was enriched in GO terms of cellular defense response, cortical cytoskeleton organization, immune response to tumor cell, positive regulation of adaptive immune response, positive regulation of cyclin dependent protein kinase activity, positive regulation of cytokine production involved in immune response, positive regulation of interleukin-2 production, regulation of defense response to virus by host, regulation of DNA recombination, and T cell chemotaxis. **(B)** High ARNTL2 expression was enriched in KEGG pathways of acute myeloid leukemia, antigen processing and presentation, cell cycle, chemokine signaling pathway, chronic myeloid leukemia, FcγR mediated phagocytosis, focal adhesion, natural killer cell mediated cytotoxicity, regulation of actin cytoskeleton, T cell receptor signaling pathway.


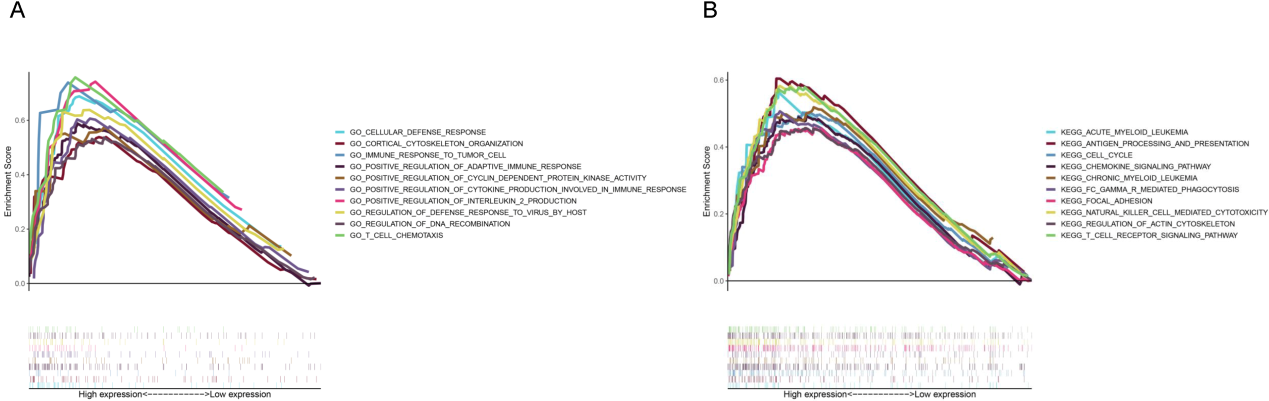


**Supplementary Figure S3.** ARNTL2 expression pattern in different cancer types. The bar plot displayed the differential expression between various cancer types and their normal tissue counterpart. ** *P*<0.01; *** *P*<0.001. **Abbreviations:** ACC, Adrenocortical carcinoma; BLCA, Bladder Urothelial Carcinoma; BRCA, Breast invasive carcinoma; CESC, Cervical squamous cell carcinoma and endocervical adenocarcinoma; CHOL, Cholangiocarcinoma; COAD, Colon adenocarcinoma; DLBC, Lymphoid Neoplasm Diffuse Large B-cell Lymphoma; ESCA, Esophageal carcinoma; GBM, Glioblastoma multiforme; HNSC, Head and Neck squamous cell carcinoma; KICH, Kidney Chromophobe; KIRC, Kidney renal clear cell carcinoma; KIRP, Kidney renal papillary cell carcinoma; LAML, Acute Myeloid Leukemia; LGG, Brain Lower Grade Glioma; LIHC, Liver hepatocellular carcinoma; LUAD, Lung adenocarcinoma; LUSC, Lung squamous cell carcinoma; MESO, Mesothelioma; OV, Ovarian serous cystadenocarcinoma; PAAD, Pancreatic adenocarcinoma; PCPG, Pheochromocytoma and Paraganglioma; PRAD, Prostate adenocarcinoma; READ, Rectum adenocarcinoma; SARC, Sarcoma; SKCM, Skin Cutaneous Melanoma; STAD, Stomach adenocarcinoma; TGCT, Testicular Germ Cell Tumors; THCA, Thyroid carcinoma; THYM, Thymoma; UCEC, Uterine Corpus Endometrial Carcinoma; UCS, Uterine Carcinosarcoma; UVM, Uveal Melanoma.


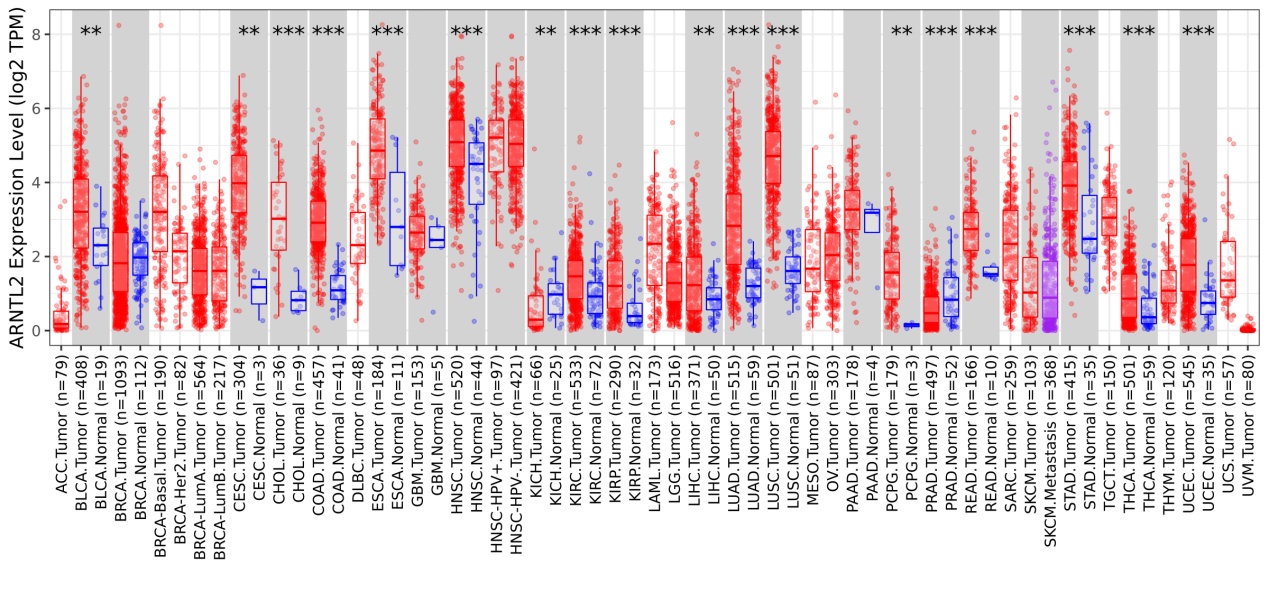

Supplement: Supplementary file 1 [file get_supplementary_file.php]
